# Supplementary material for: Skin Microbial Community Associated to Strawberry Disease in Farmed Rainbow Trout (Oncorhynchus mykiss Walbaum, 1792)
Source: MDPI journal article supplement (doi:10.3390/microorganisms12010217), 2024-01-21
Supplement: s1 [file s1]

---

## Supplementary Material

### Skin Microbial Community Associated to Strawberry Disease in Farmed Rainbow Trout (*Oncorhynchus mykiss* Walbaum, 1792)

Alda Pardo <sup>1,2</sup>, Alejandro Villasante <sup>1,3</sup> and Jaime Romero <sup>1,\*</sup>

---

Figure S1.- Macroscopic skin lesion caused by SD (Strawberry Disease).

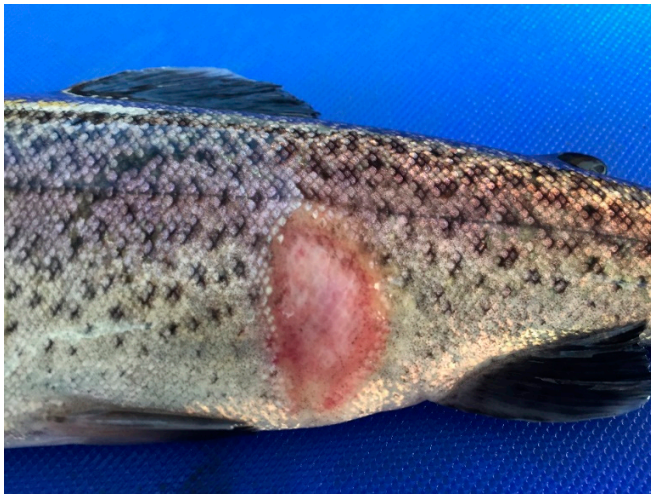

Figure S2.- Rarefaction curves of skin samples from trout with lesions (injury) and without lesions (non-injury).

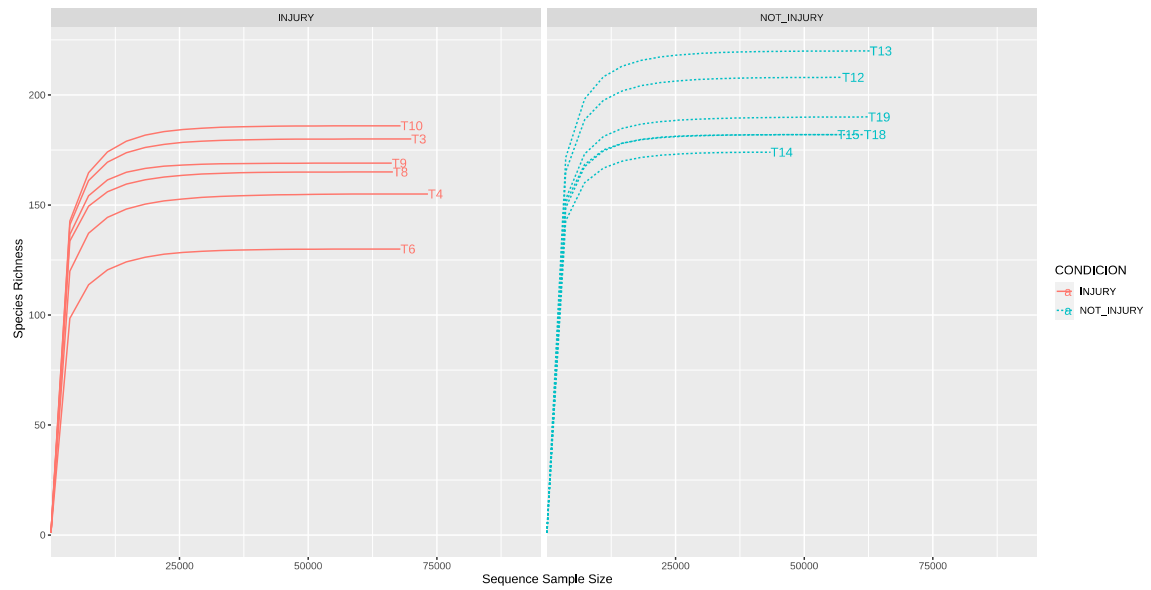

Table S1.- Highly similar sequences to the Candidatus Midichloria NGS sequence (ASV; 265 bp) were identified using megablast (blastn) in GenBank.

| items | Accession Number | % identity | alignment length | mismatches | gap opens | Citation          | PUBMED or DOI              | Source/Organism              |
|-------|------------------|------------|------------------|------------|-----------|-------------------|----------------------------|------------------------------|
| 1     | MN128406.2       | 100.000    | 265              | 0          | 0         | Unpublished       |                            | environmental sample         |
| 2     | EU555284.1       | 100.000    | 265              | 0          | 0         | Lloyd 2008        | <a href="#">19149374</a>   | skin rainbow trout           |
| 3     | KT851867.1       | 99.245     | 265              | 2          | 0         | Zaila 2017        | <a href="#">28232825</a>   | Ichthyophthirius multifiliis |
| 4     | KT851863.1       | 99.245     | 265              | 2          | 0         | Zaila 2017        | <a href="#">28232825</a>   | Ichthyophthirius multifiliis |
| 5     | KT851862.1       | 99.245     | 265              | 2          | 0         | Zaila 2017        | <a href="#">28232825</a>   | Ichthyophthirius multifiliis |
| 6     | KT851804.1       | 99.245     | 265              | 2          | 0         | Zaila 2017        | <a href="#">28232825</a>   | Ichthyophthirius multifiliis |
| 7     | KT851759.1       | 99.245     | 265              | 2          | 0         | Zaila 2017        | <a href="#">28232825</a>   | Ichthyophthirius multifiliis |
| 8     | KT851803.1       | 98.872     | 266              | 2          | 1         | Zaila 2017        | <a href="#">28232825</a>   | Ichthyophthirius multifiliis |
| 9     | EU315771.1       | 95.849     | 265              | 11         | 0         | Hornok 2008       | <a href="#">18495345</a>   | flies and ticks              |
| 10    | LC381237.1       | 95.472     | 265              | 12         | 0         | Adenyo 2020       | 10.1016/j.actatropica.2020 | ticks                        |
| 11    | MK416233.1       | 95.472     | 265              | 12         | 0         | Selmi 2019        | <a href="#">31398530</a>   | ticks                        |
| 12    | KY910125.1       | 95.472     | 265              | 12         | 0         | Unpublished       |                            | ticks                        |
| 13    | MN783559.1       | 95.472     | 265              | 12         | 0         | Unpublished       |                            | ticks                        |
| 14    | MN783558.1       | 95.472     | 265              | 12         | 0         | Unpublished       |                            | ticks                        |
| 15    | LT575865.1       | 95.472     | 265              | 12         | 0         | Unpublished       |                            | ticks                        |
| 16    | LT575864.1       | 95.472     | 265              | 12         | 0         | Unpublished       |                            | ticks                        |
| 17    | LT575863.1       | 95.472     | 265              | 12         | 0         | Unpublished       |                            | ticks                        |
| 18    | LT575860.1       | 95.472     | 265              | 12         | 0         | Unpublished       |                            | ticks                        |
| 19    | OR295409.1       | 95.472     | 265              | 12         | 0         | Unpublished       |                            | ticks                        |
| 20    | CP094379.1       | 95.472     | 265              | 12         | 0         | Unpublished       |                            | ticks                        |
| 21    | OM982502.1       | 95.472     | 265              | 12         | 0         | Sgroi 2022        | <a href="#">35997363</a>   | ticks                        |
| 22    | OM982499.1       | 95.472     | 265              | 12         | 0         | Sgroi 2022        | <a href="#">35997363</a>   | ticks                        |
| 23    | HF568843.2       | 95.472     | 265              | 12         | 0         | Unpublished       |                            | ticks                        |
| 24    | MZ476215.1       | 95.472     | 265              | 12         | 0         | Unpublished       |                            | ticks                        |
| 25    | MZ476204.1       | 95.472     | 265              | 12         | 0         | Unpublished       |                            | ticks                        |
| 26    | MZ476173.1       | 95.472     | 265              | 12         | 0         | Unpublished       |                            | ticks                        |
| 27    | MZ476048.1       | 95.472     | 265              | 12         | 0         | Unpublished       |                            | ticks                        |
| 28    | MZ475999.1       | 95.472     | 265              | 12         | 0         | Unpublished       |                            | ticks                        |
| 29    | LR742713.1       | 95.472     | 265              | 12         | 0         | Unpublished       |                            | ticks                        |
| 30    | LR742712.1       | 95.472     | 265              | 12         | 0         | Unpublished       |                            | ticks                        |
| 31    | LR742711.1       | 95.472     | 265              | 12         | 0         | Unpublished       |                            | ticks                        |
| 32    | LR742710.1       | 95.472     | 265              | 12         | 0         | Unpublished       |                            | ticks                        |
| 33    | MW092747.1       | 95.472     | 265              | 12         | 0         | Unpublished       |                            | ticks                        |
| 34    | MT965821.1       | 95.472     | 265              | 12         | 0         | Unpublished       |                            | ticks                        |
| 35    | MT965820.1       | 95.472     | 265              | 12         | 0         | Unpublished       |                            | ticks                        |
| 36    | FM992373.1       | 95.472     | 265              | 12         | 0         | Beninati 2009     | <a href="#">19732154</a>   | ticks                        |
| 37    | FM992372.1       | 95.472     | 265              | 12         | 0         | Beninati 2009     | <a href="#">19732154</a>   | ticks                        |
| 38    | AM411593.1       | 95.472     | 265              | 12         | 0         | Epis 2008         | <a href="#">18205982</a>   | ticks                        |
| 39    | EF687768.1       | 95.472     | 265              | 12         | 0         | Venzal 2008       | <a href="#">18071910</a>   | ticks                        |
| 40    | AF497583.1       | 95.472     | 265              | 12         | 0         | Parola 2003       | <a href="#">12682151</a>   | ticks                        |
| 41    | DQ379964.1       | 95.472     | 265              | 12         | 0         | Loftis 2006       | <a href="#">17004028</a>   | ticks                        |
| 42    | LC683106.1       | 95.094     | 265              | 13         | 0         | Qiu 2022          | <a href="#">35631087</a>   | ticks                        |
| 43    | LT898326.1       | 95.094     | 265              | 13         | 0         | Unpublished       |                            | ticks                        |
| 44    | KX359181.1       | 95.094     | 265              | 13         | 0         | Santos-Silva 2016 | <a href="#">27894847</a>   | ticks                        |
| 45    | MN783572.1       | 95.094     | 265              | 13         | 0         | Unpublished       |                            | ticks                        |
| 46    | MN783569.1       | 95.094     | 265              | 13         | 0         | Unpublished       |                            | ticks                        |
| 47    | MN783566.1       | 95.094     | 265              | 13         | 0         | Unpublished       |                            | ticks                        |
| 48    | MN783565.1       | 95.094     | 265              | 13         | 0         | Unpublished       |                            | ticks                        |
| 49    | MN783564.1       | 95.094     | 265              | 13         | 0         | Unpublished       |                            | ticks                        |
| 50    | MN783563.1       | 95.094     | 265              | 13         | 0         | Unpublished       |                            | ticks                        |
